# Supplementary material
Source: publisher site journal article supplement (https://static.cambridge.org/content/id/urn:cambridge.org:id:article:S0007114520002925/resource/name/S0007114520002925supp001.docx)

**Supplementary Data 2:** American Dietetic Association’s Quality Criteria Checklist for Primary Research; a summary table of included studies


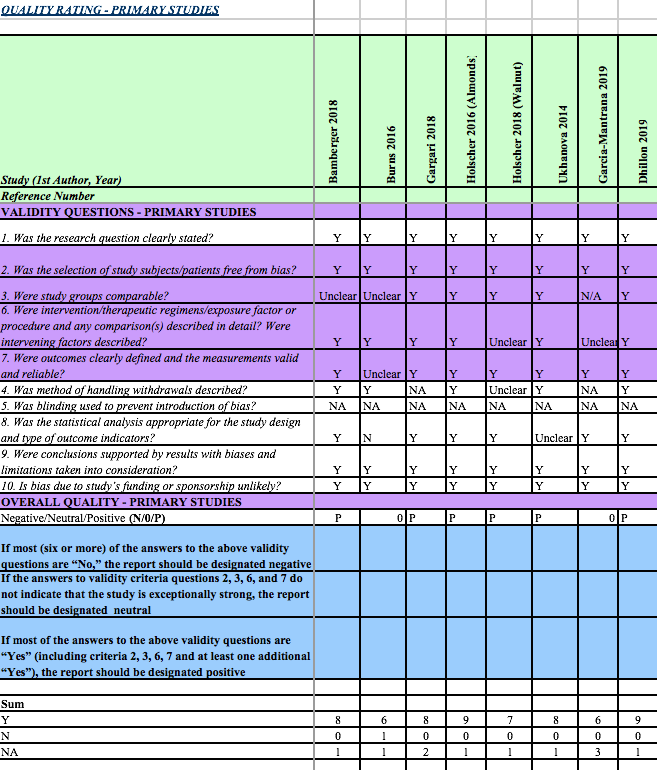

Supplement: Supplementary file 1 [file S0007114520002925supp001.docx]
